# Supplementary material
Source: PubMed Central journal article supplement (PMC3552136)

## Supplemental Information

### FAK Regulates the Localization and Retention of Pro-B Cells in BM Microenvironments.

Shin-Young Park, Peter Wolfram, Kimberly Canty, Brendan Harley, César Nombela-Arrieta, Gregory Pivarnik, John Manis, Hilary E Beggs, and Leslie E Silberstein

**Figure S1. Analysis of *Cre*-mediated *Fak* deletion.** (A) Schematic representation of the wild type, floxed *Fak* allele, and excised locus. (B) PCR and immunoblot (IB) analysis of BM CD19<sup>+</sup> B cells (purity > 97%) and whole BM (WBM) from CD19-*Cre*<sup>+/-</sup> *Fak*<sup>fl/fl</sup> knock out mice (KO) and CD19-*Cre*<sup>-/-</sup> *Fak*<sup>fl/fl</sup> control mice (WT; 8 week old). *Fak* gene assessed by PCR with primer 1, 2 and 3. FAK protein expression by WB with a monoclonal anti-FAK antibody (Upstate Biotech.) (C) *Fak* gene deletion by PCR in sorted B cells of BM: Pro-B (CD19<sup>+</sup> B220<sup>lo</sup> CD43<sup>+</sup> IgM<sup>-</sup>), Pre-B (CD19<sup>+</sup> B220<sup>lo</sup> CD43<sup>-</sup> IgM<sup>-</sup>), Immature B cells (Imm B, CD19<sup>+</sup> B220<sup>lo</sup> IgM<sup>+</sup>), Mature B cells (Mat B, CD19<sup>+</sup> B220<sup>hi</sup> IgM<sup>+</sup>) of *Fak* KO mice. (D) PCR and immunoblot analysis of splenic CD19<sup>+</sup> B cells of *Fak* KO and WT control mice. Representative data from four independent experiments are shown. (E) Immunoblot (IB) analysis of Pyk2 protein level with monoclonal anti-Pyk2 (Transduction Laboratory) antibodies in sorted B cells of BM: Pro-B, Pre-B, Immature B cells (Imm B), Mature B cells (Mat B) of WT and *Fak* KO mice. After secondary horseradish peroxidase-conjugated antibodies (Bio-Rad) were treated, immunoblots were analyzed by enhanced chemiluminescence (Amersham Biosciences). (F) *Cre*-mediated excision of floxed stop codon leads to EGFP gene expression. PCR analysis of *Cre*-mediated *Fak* gene deletion were performed with primer P1, P2, and P3 in EGFP<sup>+</sup> cells (G2 gate) and EGFP<sup>-</sup> control cells (G1 gate) of CD19-*Cre*<sup>+/-</sup> *Fak*<sup>fl/fl</sup> ROSA26-EGFP<sup>+</sup> (KO) mice. ROSA26-EGFP<sup>-</sup> mice were used as controls for flow cytometry. (G) *Fak* gene deletion was analyzed by PCR in sorted B cell subpopulations from mb-1-*Cre*<sup>+/-</sup> *Fak*<sup>fl/fl</sup> ROSA26-EGFP<sup>+</sup> or mb-1-*Cre*<sup>+/-</sup> *Fak*<sup>wt/wt</sup> ROSA26-EGFP<sup>+</sup> mice. BM CD3<sup>+</sup> T cell from mb-1-*Cre*<sup>+/-</sup>

*Fak<sup>fl/fl</sup>* ROSA26-EGFP<sup>+</sup> mice and BM CD19<sup>+</sup> B cells from control WT mice were used as controls. (H) *Cre*-mediated excision of floxed genes were monitored by EGFP gene expression in B cell populations of *mb-1-Cre<sup>+/-</sup> Fak<sup>fl/fl</sup>* ROSA26-EGFP<sup>+</sup> mice. B220<sup>-</sup> cells were used as negative controls. % of EGFP<sup>+</sup> cell population is marked above each gate. Representative data from four independent experiments are shown.

**Figure S2. *Fak* deletion does not affect the number of follicular and marginal zone B cells in spleen.**

(A) Single cell suspensions from spleen were analyzed by flow cytometry. Gate: Imm – CD19<sup>+</sup> CD23<sup>-</sup> CD21/35<sup>-</sup> immature B cells, FO – CD19<sup>+</sup> CD23<sup>+</sup> CD21/35<sup>mid</sup> follicular B cells, MZ – CD19<sup>+</sup> CD23<sup>-/lo</sup> CD21/35<sup>hi</sup> marginal zone B cells. (B) Splenic transitional B cells were analyzed by flow cytometry. IgM<sup>+</sup> CD23<sup>-</sup> transitional 1 (T1), IgM<sup>+</sup> CD23<sup>+</sup> transitional 2 (T2), and IgM<sup>-</sup> CD23<sup>+</sup> transitional 3 (T3) B cells were gated as shown. % of gated cell population is marked next to each gate. Representative data from four independent experiments are shown. (C) Total numbers of each transitional B subset cells per spleen were calculated using flow cytometry. Student's t-tests were performed as shown \*, P<0.05 and \*\*, P<0.01 (Unpaired, two-tailed).

**Figure S3. Laser scanning cytometry analysis of spleen sections and morphology of the femoral BM cavity.**

(A) Validation of quantitative imaging cytometry on 5µm histologic sections of cryopreserved splenic tissue. B220<sup>+</sup> B cells (green) and nucleated cells (blue, DAPI) in C57BL/6 mouse spleen. Image: laser scan mosaic image of the entire tissue section. Scale bar: 500µm. Frozen sections were stained with rat anti-B220 antibody (RA3-6B2, BD Biosciences) or isotype control antibody (rat IgG2a, BD Biosciences) followed by Alexa 488- labeled secondary antibody and DAPI nuclear staining dye. Individual cellular events are identified by nuclear staining (DAPI). % of B220<sup>+</sup> cells were gated from dot plot. (B) Hematoxylin and Eosin (H&E) staining of the femoral bone from C57BL/6 wild type

mouse. The magnified diaphyseal cavity shows cortical bone surrounding dense BM and a portion of central sinus (pink cavity). The distal metaphysis shows the characteristic trabecular bone structure with BM within the trabeculae. Blue arrows: bone surface, Black dotted region: endosteal region, Black arrows: vascular system, Green dotted region: central medullary region. Representative data from four independent experiments are shown.

**Figure S4. Localization of progenitor B cells in femoral BM microenvironments by solid-phase laser scanning cytometry.** Longitudinal femur sections from C57BL/6 wild type (WT) mice were stained with B cell markers. Sinusoidal niche was stained by goat anti-CD105 (endoglin) antibody / Dylight 649-labeled donkey anti-goat IgG antibody (white), followed by nuclear DAPI staining (blue). Stained slides were analyzed by iCys imaging cytometry. (A) A square area of a femur is magnified to show a representative region image. (B) Representative field images of CD43, B220, and endoglin /DAPI channels are shown. Arrowheads indicate B220<sup>+</sup> CD43<sup>+</sup> pro-B cell. (C) A field image of DAPI channel is shown with threshold contours which are expanded by 2 pixels for integration contours. (D) Fluorescence intensity in different channels is quantified for each individual event as shown in a dot plot with specific gates based on isotype control staining. Numbers within the plot indicate the percentage of cells in each population. Representative data from four independent experiments are shown.

# Park et al., Figure S1

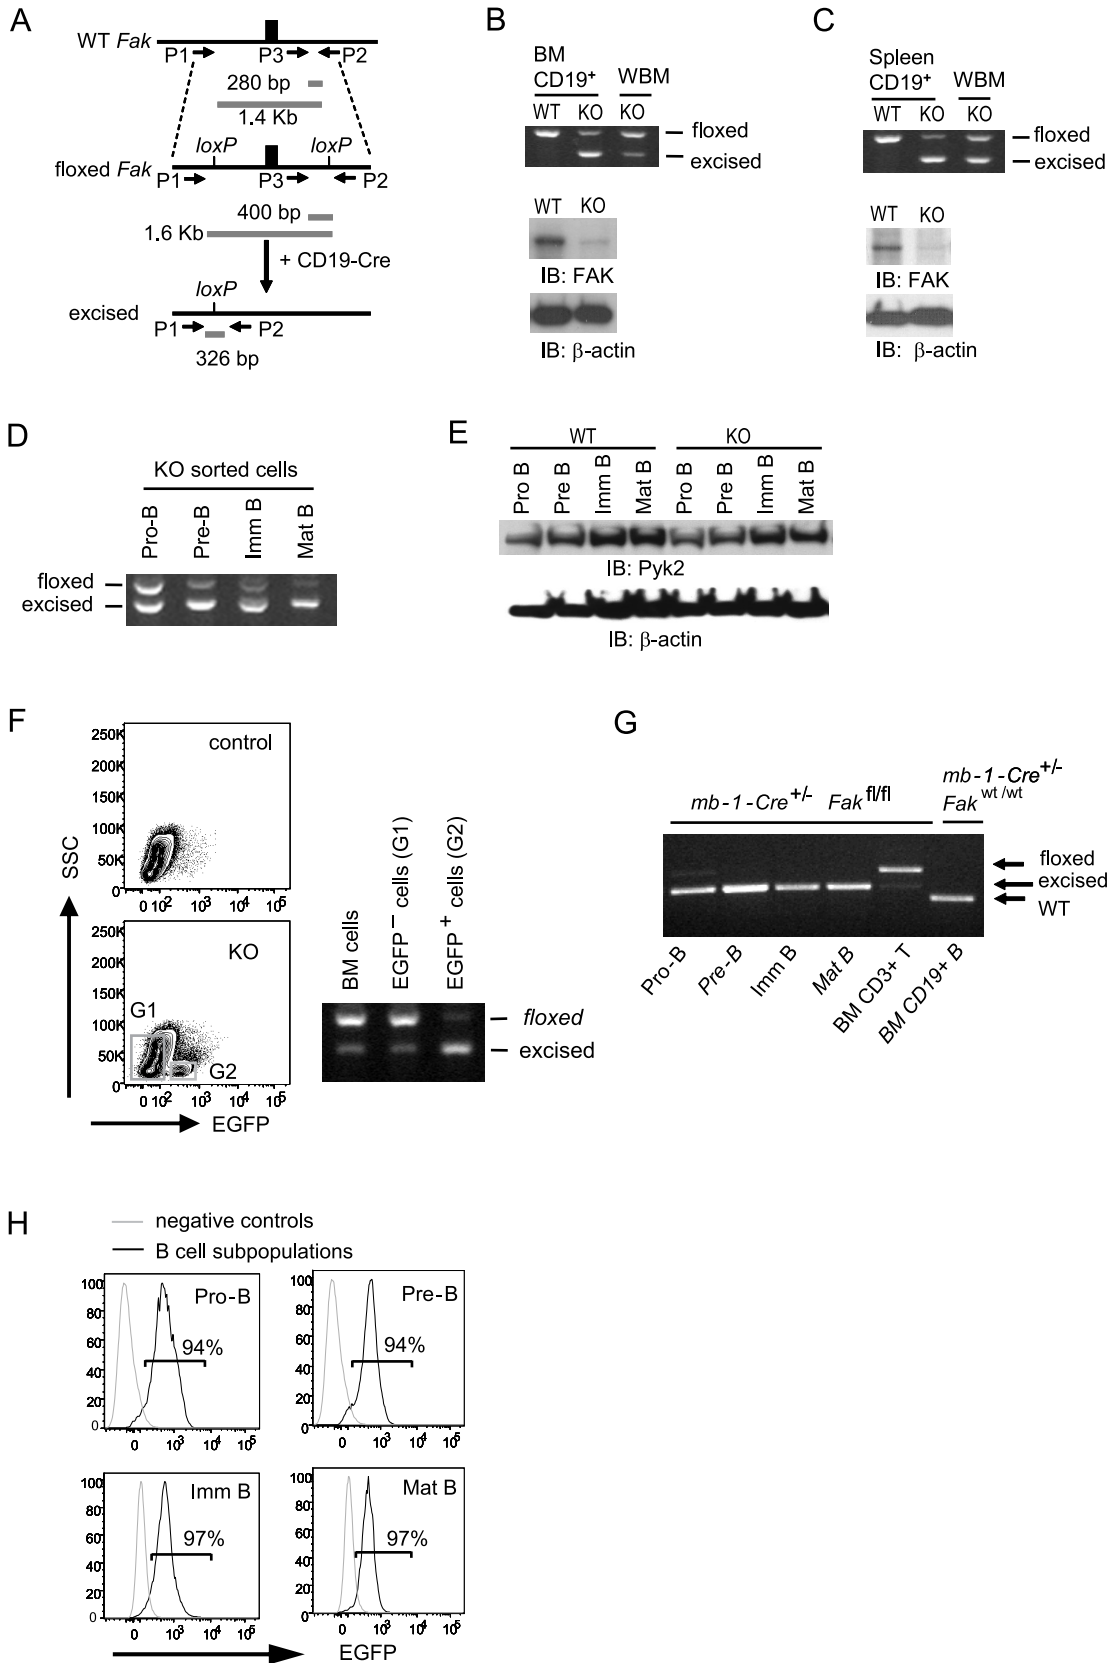

# Park et al., Figure S2

A

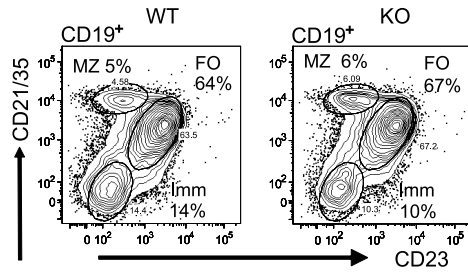

B

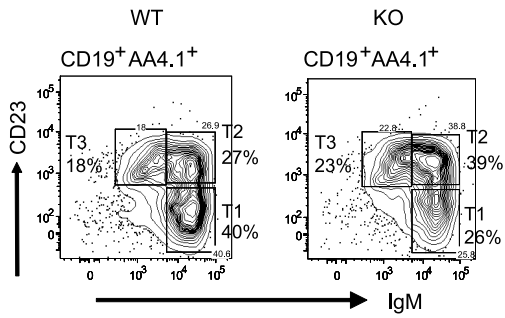

C

Number of transitional B cells in spleen

| Subset | WT          | KO            |
|--------|-------------|---------------|
| T1     | 2.39 ± 0.15 | 1.65 ± 0.17** |
| T2     | 1.82 ± 0.13 | 2.31 ± 0.14*  |
| T3     | 1.17 ± 0.08 | 1.38 ± 0.10   |

(mean ± SEM, millions, n=8)

# Park et al., Figure S3

A

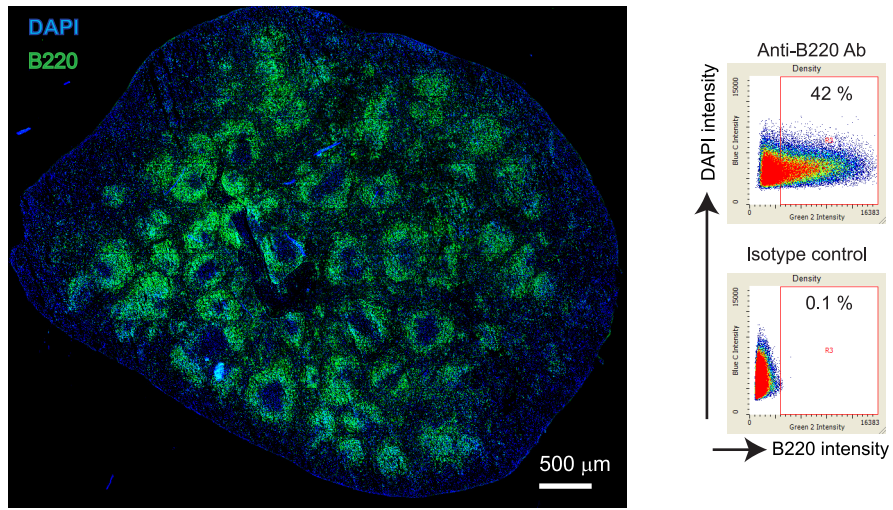

B

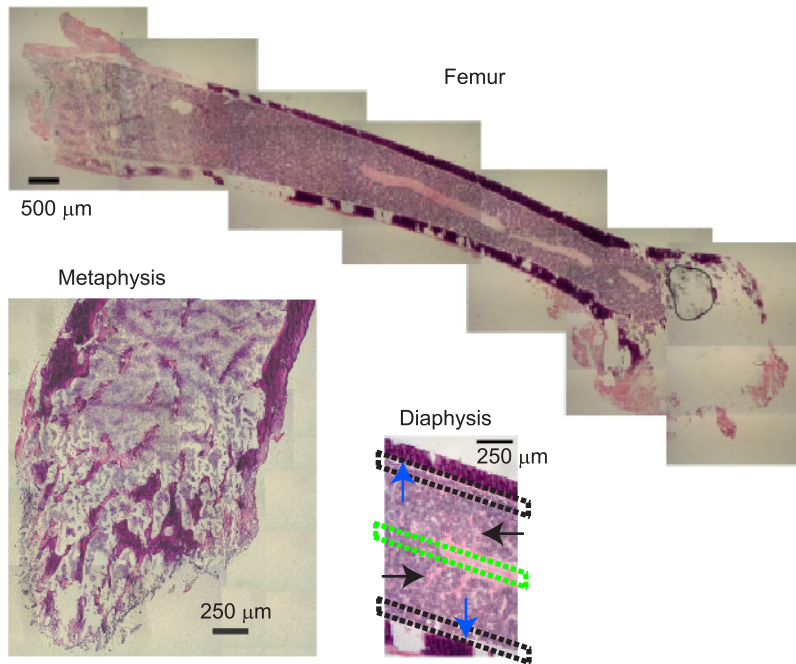

# Park et al., Figure S4

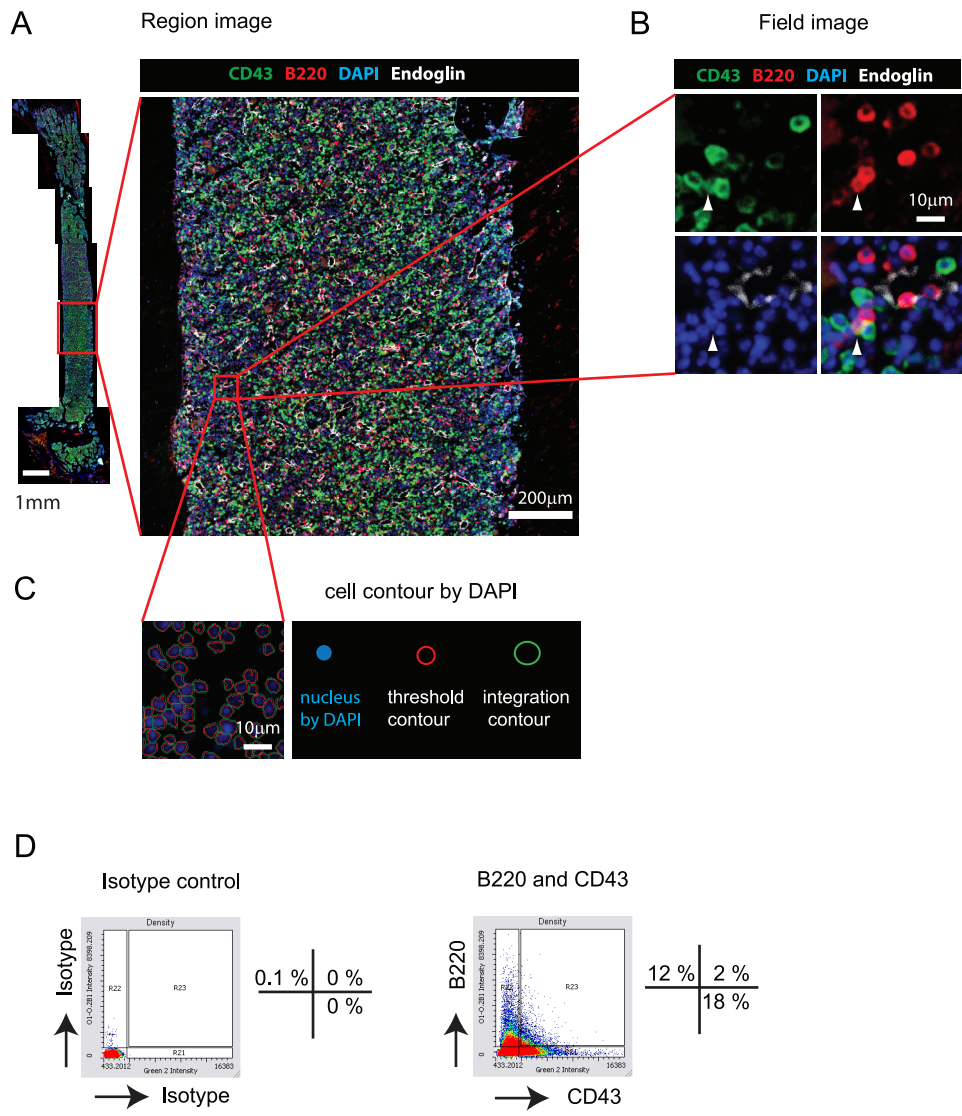

Supplement: NIHMS429416-supplement-1.pdf [file NIHMS429416-supplement-1.pdf]
